# Supplementary material
Source: PubMed Central journal article supplement (PMC10656670)
Supplement: jama-e2323363-s003.pdf [file jama-e2323363-s003.pdf]

## Supplemental Online Content

Stewart TG, Rebolledo PA, Mourad A, et al; for the Accelerating COVID-19 Therapeutic Interventions and Vaccines (ACTIV)-6 Study Group and Investigators. Higher-Dose Fluvoxamine and Time to Sustained Recovery in Outpatients With COVID-19. *JAMA*. Published online November 17, 2023. doi:10.1001/jama.2023.23363

### eMethods, eTables, and eFigures

This supplemental material has been provided by the authors to give readers additional information about their work.

# Supplemental Online Content

## Table of Contents

|                                                                                                                                     |    |
|-------------------------------------------------------------------------------------------------------------------------------------|----|
| <b>ACTIV-6 Executive Committee</b> .....                                                                                            | 3  |
| <b>ACTIV-6 Protocol Oversight Committee</b> .....                                                                                   | 3  |
| <b>ACTIV-6 Clinical Trial Team</b> .....                                                                                            | 4  |
| <b>ACTIV-6 Clinical Coordinating Center</b> .....                                                                                   | 4  |
| <b>ACTIV-6 Independent Data Monitoring Committee</b> .....                                                                          | 6  |
| <b>ACTIV-6 Clinical Events Classification Committee</b> .....                                                                       | 6  |
| <b>ACTIV-6 Data Coordinating Center</b> .....                                                                                       | 6  |
| <b>ACTIV-6 Site Investigators / Study Coordinators</b> .....                                                                        | 7  |
| <b>Supplemental Methods</b> .....                                                                                                   | 11 |
| <b>Participant Monitoring</b> .....                                                                                                 | 11 |
| <b>Independent Data Monitoring Committee Oversight</b> .....                                                                        | 11 |
| <b>Handling of Missing Data</b> .....                                                                                               | 11 |
| <b>Proportional Hazards</b> .....                                                                                                   | 11 |
| <b>Heterogeneity of Treatment Effect Analysis</b> .....                                                                             | 11 |
| <b>COVID-19 Ordinal Outcome Scale</b> .....                                                                                         | 12 |
| <b>eTable 1. Baseline symptom prevalence and severity</b> .....                                                                     | 13 |
| <b>eTable 2. Serious adverse events</b> .....                                                                                       | 15 |
| <b>eFigure 1. Time from symptom onset to receipt of drug</b> .....                                                                  | 16 |
| <b>eFigure 2. Sensitivity analysis of time to sustained recovery</b> .....                                                          | 17 |
| <b>eFigure 3. All-cause hospitalization or death for fluvoxamine vs placebo</b> .....                                               | 18 |
| <b>eFigure 4. All-cause hospitalization, urgent care, emergency department visit, or death for fluvoxamine versus placebo</b> ..... | 19 |
| <b>eFigure 5. Participants' COVID clinical progression scale at day 7, 14, and 28</b> .....                                         | 20 |
| <b>eFigure 6. Kaplan-Meier curves of sustained recovery by onset of symptoms and symptom severity</b> .....                         | 21 |
| <b>eFigure 7. Heterogeneity of treatment effect between fluvoxamine and placebo for time to recovery</b> .....                      | 22 |
| <b>eFigure 8. Kaplan-Meier curves of time to recovery stratified by symptom onset</b> .....                                         | 23 |
| <b>eFigure 9. Posterior densities of primary endpoint model</b> .....                                                               | 24 |

## **ACTIV-6 Executive Committee**

Adrian F. Hernandez, Duke Clinical Research Institute (Clinical Coordinating Center PI)

Susanna Naggie, Duke Clinical Research Institute (Clinical Coordinating Center Co-PI)

G. Michael Felker, Duke Clinical Research Institute (Medical Monitor, blinded)

Allison DeLong, Duke Clinical Research Institute

Rhonda Wilder, Duke Clinical Research Institute

Christopher J. Lindsell, Duke Clinical Research Institute (Data Coordinating Center Executive Director)

Russell L. Rothman, Vanderbilt University Medical Center (Data Coordinating Center PI)

Thomas G. Stewart, University of Virginia

Sean Collins, Vanderbilt University Medical Center

Sarah Dunsmore, National Center for Advancing Translational Sciences

Stacey Adam, Foundation for the National Institutes of Health

David Boulware, University of Minnesota

Elizabeth Shenkman, University of Florida

Florence Thicklin, Stakeholder Advisory Committee

Matthew William McCarthy, Weill Cornell Medicine, Stakeholder Advisory Committee

George Hanna, Biomedical Advanced Research and Development Authority

## **ACTIV-6 Protocol Oversight Committee**

David Boulware, University of Minnesota, POC Co-Chair

Elizabeth Shenkman, University of Florida, POC Co-Chair

Adrian F. Hernandez, Duke Clinical Research Institute (Clinical Coordinating Center PI)

Susanna Naggie, Duke Clinical Research Institute (Clinical Coordinating Center co-PI)

G. Michael Felker, Duke Clinical Research Institute (Medical Monitor, blinded)

Allison DeLong, Duke Clinical Research Institute

Rhonda Wilder, Duke Clinical Research Institute

Christopher J. Lindsell, Duke Clinical Research Institute (Data Coordinating Center Executive Director)

Russell L. Rothman, Vanderbilt University Medical Center (Data Coordinating Center PI)

Thomas G. Stewart, University of Virginia

Sean Collins, Vanderbilt University Medical Center

Sarah Dunsmore, National Center for Advancing Translational Sciences

Stacey Adam, Foundation for the National Institutes of Health

Florence Thicklin, Stakeholder Advisory Committee

Matthew William McCarthy, Weill Cornell Medicine, Stakeholder Advisory Committee

George Hanna, Biomedical Advanced Research and Development Authority

Adit Ginde, University of Colorado Denver – Anschutz

Mario Castro, University of Kansas Medical Center

Dushyantha Jayaweera, University of Miami

Mark Sulkowski, John Hopkins University

Nina Gentile, Lewis Katz School of Medicine at Temple University

Kathleen McTigue, University of Pittsburgh Medical Center

Kim Marschhauser, PCORI

## **ACTIV-6 Clinical Trial Team**

Adrian F. Hernandez, Duke Clinical Research Institute (Clinical Coordinating Center PI)

Susanna Naggie, Duke Clinical Research Institute (Clinical Coordinating Center Co-PI)

G. Michael Felker, Duke Clinical Research Institute (Medical Monitor, blinded)

Allison DeLong, Duke Clinical Research Institute

Rhonda Wilder, Duke Clinical Research Institute

Christopher J. Lindsell, Duke Clinical Research Institute (Data Coordinating Center Executive Director)

Russell L. Rothman, Vanderbilt University Medical Center (Data Coordinating Center PI)

Thomas G. Stewart, University of Virginia

## **ACTIV-6 Clinical Coordinating Center**

Adrian F. Hernandez, Duke Clinical Research Institute (Clinical Coordinating Center PI)

Susanna Naggie, Duke Clinical Research Institute (Clinical Coordinating Center Co-PI)

G. Michael Felker, Duke Clinical Research Institute (Medical Monitor, blinded)

Allison DeLong, Duke Clinical Research Institute

Rhonda Wilder, Duke Clinical Research Institute

Ryan Fraser, Duke Clinical Research Institute

Mark Ward, Duke Clinical Research Institute

Jennifer Gamboa Jackman, Duke Clinical Research Institute

M. Patricia McAdams, Duke Clinical Research Institute

Julia Vail, Duke Clinical Research Institute

Kayla Korzekwinski, Duke Clinical Research Institute

Martina Oyelakin, Duke Clinical Research Institute

Julie Chopp, Duke Clinical Research Institute

Desmon Randle, Duke Clinical Research Institute

Samantha Dockery, Duke Clinical Research Institute

Rodney Adkins, Duke Clinical Research Institute

Mathew Crow, Duke Clinical Research Institute

Erin Nowell, Duke Clinical Research Institute

Kadie Wells, Duke Clinical Research Institute

Alicia Herbert, Duke Clinical Research Institute

Allegra Stone, Duke Clinical Research Institute

Heather Heavlin, Duke Clinical Research Institute

Linley Brown, Duke Clinical Research Institute

Tina Harding, Duke Clinical Research Institute

Amanda Harrington, Duke Clinical Research Institute

Meaghan Beauchaine, Duke Clinical Research Institute

Kelly Lindblom, Duke Clinical Research Institute

Andrea Burns, Duke Clinical Research Institute

Ahmad Mourad, Duke Clinical Research Institute

## ACTIV-6 Independent Data Monitoring Committee

### **Voting Members:**

Clyde Yancy, Northwestern University Feinberg School of Medicine (Chair)

Adaora Adimora, University of North Carolina, Chapel Hill (Vice-chair)

Susan Ellenberg, University of Pennsylvania

Kaleab Abebe, University of Pittsburgh

Arthur Kim, Massachusetts General Hospital

John D. Lantos, Children's Mercy Hospital

Jennifer Silvey-Cason, Participant representative

### **Statistical Data Analysis Center:**

Frank Rockhold, Duke Clinical Research Institute (Lead faculty statistician)

Sean O'Brien, Duke Clinical Research Institute (Faculty statistician)

Frank Harrell, Vanderbilt University Medical Center (DCC-SDAC Faculty Liaison)

Zhen Huang, Duke Clinical Research Institute (Lead statistician)

## ACTIV-6 Clinical Events Classification Committee

Renato Lopes, (CEC PI)

**Faculty Reviewers:** W. Schuyler Jones, Antonio Gutierrez, Robert Harrison, David Kong, Robert McGarrah, Michelle Kelsey, Brad Kolls, Cina Sasannejad, Rajendra (Raj) Mehta, Thomas Povsic

**Fellow Reviewers:** Konstantin Krychtiuk, Alexander Graham, Mark Kittipibul

## ACTIV-6 Data Coordinating Center

David Aamodt, Vanderbilt University Medical Center

Jess Collins, Vanderbilt University Medical Center

Sheri Dixon, Vanderbilt University Medical Center

Yue Gao, Vanderbilt University Medical Center

John Graves, Vanderbilt University Medical Center

James Grindstaff, Vanderbilt University Medical Center

Frank Harrell, Vanderbilt University Medical Center (DCC-SDAC Faculty Liaison)

Jessica Lai, Vanderbilt University Medical Center

Vicky Liao, Vanderbilt University Medical Center

Christopher J. Lindsell, Duke Clinical Research Institute (Data Coordinating Center Executive Director)

Itzel Lopez, Vanderbilt University Medical Center

Elizabeth Manis, Vanderbilt University Medical Center

Kalley Mankowski, Vanderbilt University Medical Center

Jessica Marlin, Vanderbilt University Medical Center

Alyssa Merkel, Vanderbilt University Medical Center

Sam Nwosu, Vanderbilt University Medical Center

Savannah Obregon, Vanderbilt University Medical Center

Dirk Orozco, Vanderbilt University Medical Center

Nelson Prato, Vanderbilt University Medical Center

Max Rohde, Vanderbilt University Medical Center

Russell Rothman, Vanderbilt University Medical Center (Data Coordinating Center PI)

Jana Shirey-Rice, Vanderbilt University Medical Center

Krista Vermillion, Vanderbilt University Medical Center

Jacob Smith, Vanderbilt University Medical Center

Thomas Stewart, Vanderbilt University Medical Center / University of Virginia (Lead statistician)

Hsi-nien Tan, Vanderbilt University Medical Center

Meghan Vance, Vanderbilt University Medical Center

Maria Weir, Vanderbilt University Medical Center

## ACTIV-6 Site Investigators / Study Coordinators

**A New Start II, LLC:** William (Kelly) Vincent / Raina Vincent. **Advanced Medical Care, Ltd:** Ray Bianchi / Jen Premas. **AMRON Vitality and Wellness Center, LLC:** Diana Cordero-Loperena / Evelyn Rivera. **Ananda Medical Clinic:** Madhu Gupta / Greg Karawan. **Arena Medical Group:** Joseph Arena / Sonaly DeAlmeida. **Assuta Family Medical Group APMC:** Soroush Ramin / Jaya Nataraj. **Boston Medical Center:** Julien

Dedier / Ana Maria Ramirez / Katherine Waite. **Brooke Army Medical Center (Geneva Foundation):** Jason Okulicz / Joseph Marcus / Alexis Southwell / Genice Jacques / Cedar Sexton. **Bucks County Clinical Research:** David Miller / Ginger Brounce. **Christ the King Health Care, P.C.:** Constance George-Adebayo / Adeolu Adebayo. **Christus Saint Frances Hospital:** Jose Zapatero / Julie Clement. **Christus St. Vincent Regional Medical Center:** Theresa Ronan / Ashley Woods / Christopher Gallegos / Tamara Flys / Olivia Sloan. **Clincept:** Anthony Olofintuyi / Joshua Samraj / Jackelyn Samraj / Alma Vasbinder / Amaya Averett. **Clinical Trials Center of Middle Tennessee:** Alex Slandzicki & Aaron Milstone / Jessica Wallan & Lindsey Robbs. **Comprehensive Pain Management and Endocrinology:** Claudia Vogel / Sebastian Munoz. **David Kavtaradze MD, Inc.:** David Kavtaradze / Casandra Watson. **David Singleton MD, PA:** David Singleton / Marcus Sevier / Maria Rivon. **Del Pilar Medical and Urgent Care:** Arnold Del Pilar / Amber Spangler. **DHR Health Institute for Research:** Sohail Rao / Luis Cantu. **Diabetes and Endocrinology Assoc. of Stark County:** Arvind Krishna & Heidi Daugherty / Brandi Kerr & Kathy Evans. **Doctors Medical Group of Colorado Springs, P.C.:** Robert Spees / Mailyn Marta. **Duke University:** G. Michael Felker / Meaghan Beauchaine & Amanda Harrington. **Duke University Hospital:** Rowena Dolor / Lorraine Vergara & Jackie Jordan. **Elite Family Practice:** Valencia Burruss / Terri Hurst. **Emory University:** Igho Ofotokun & Paulina A. Rebolledo / Cecilia Zhang & Veronica E. Smith. **Essentia Health:** Rajesh Prabhu / Krystal Klicka / Amber Lightfeather. **Essential Medical Care, Inc.:** Vickie James / Marcella Rogers. **Express Family Clinic:** Pradeep Parihar / De'Ambra Torress. **Family Practice Doctors P.A.:** Chukwuemeka Oragwu / Ngozi Oguego. **First Care Medical Clinic:** Rajesh Pillai / Mustafa Juma. **Focus Clinical Research Solutions:** Ahab Gabriel / Emad Ghaly, Marian Michal. **Franciscan Health Michigan City:** Michelle Vasquez / Angela Mamon & Michelle Sheets. **G&S Medical Associates, LLC:** Gammal Hassanien / Samah Ismail & Yehia Samir. **George Washington University Hospital:** Andrew Meltzer / Soroush Shahamatdar / Ryan S. Heidish. **Geriatrics and Medical Associates:** Scott Brehaut / Angelina Roche. **GFC of Southeastern Michigan, PC:** Manisha Mehta / Nicole Koppinger. **Health Quality Primary Care:** Jose Baez / Ivone Pagan. **Highlands Medical Associates, P.A.:** Dallal Abdelsayed / Mina Aziz. **Hoag Memorial Hospital Presbyterian:** Philip Robinson & Grace Lozinski / Julie Nguyen. **HOPE Clinical Research:** Alvin Griffin & Michael Morris / Nicole Love & Bonnie Mattox & Raykel Martin. **Hugo Medical Clinic:** Victoria Pardue & Teddy Rowland. **Innovation Clinical Trials Inc.:** Juan Ruiz-Unger / Lionel Reyes Yadira Zamora & Navila Bacallao. **Jackson Memorial Hospital:** John Cienki. **Jadestone Clinical Research, LLC:** Jonathan Cohen / Ying Yuan / Jenny Li. **Jeremy W. Szeto, D.O., P.A.:** Jeremy Szeto. **Johns Hopkins University:** Mark Sulkowski / Lauren Stelmash. **L&A Morales Healthcare, Inc:** Idania Garcia del Sol & Ledular Morales Castillo / Anya Gutierrez & Sabrina Prieto. **Lakeland Regional Medical Center:** Arch Amon & Andrew Barbera / Andrew Bugajski & Walter



Wills & Kellcee Jacklin. **Lamb Health, LLC:** Deryl Lamb / Amron Harper. **Lapis Clinical Research:** Elmer Stout & Katherine Weeks / Merischia Griffin. **Lice Source Services Plantation:** Nancy Pyram-Bernard / Arlen Quintero. **Lupus Foundation of Gainesville:** Eftim Adhami & Giovanni Carrillo. **Maria Medical Center, PLLC:** Josette Maria / Diksha Paudel & Oksana Raymond. **Medical Specialists of Knoxville:** Jeffrey Summers / Tammy Turner. **Medical University of South Carolina:** Leslie Lenert / Ebony Panaccione & Elizabeth Szwast. **Mediversity Healthcare:** Ahsan Abdulghani / Pravin Vasoya. **Miller Family Practice, LLC:** Conrad Miller / Hawa Wiley. **Morehouse School of Medicine:** Austin Chan / Saadia Khizer. **North Shore University Health System/Evanston Hospital:** Nirav Shah / Oluwadamilola Adeyemi / Wei Ning Chi / July Chen / Melissa Morton-Jost. **Ochsner Clinic Foundation:** Julie Castex / Phillip Feliciano. **Olivo Wellness Medical Center:** Jacqueline Olivo & Maria Maldonado. **Pine Ridge Family Medicine Inc.:** Anthony Vecchiarelli / Diana Gaytan-Alvarez. **Premier Health:** Vijaya Cherukuri / Santia Lima. **Providence Regional Medical Center:** Radica Alicic & Allison A. Lambert / Carissa Urbat & Joni Baxter & Ann Cooper. **Rapha Family Wellness:** Dawn Linn / Laura Fisher. **Raritan Bay Primary Care & Cardiology Associates:** Vijay Patel / Yuti Patel & Roshan Talati & Priti Patel. **Romancare Health Services:** Leonard Ellison & Angee Roman / Jeffrey Harrison. **Rush University Medical Center:** James Moy & Dina Naquiallah. **Spinal Pain and Medical Rehab, PC:** Binod Shah / Santia Lima. **Stanford University:** Upinder Singh / Yasmin Jazayeri / Andrew O'Donnell / Orlando Quintero Divya Pathak. **Sunshine Walk In Clinic:** Anita Gupta / N Chandrasekar. **Superior Clinical Research:** Clifford Curtis / Briana White & Martha Dockery & Maya Hicks. **Tabitha B. Fortt, M.D., LLC:** Tabitha Fortt / Anisa Fortt. **Tallahassee Memorial Hospital:** Ingrid Jones-Ince / Alix McKee. **Tampa General Hospital:** Jason Wilson / Brenda Farlow. **Temple University Hospital:** Nina Gentile / Casey Grady. **Texas Health Physicians Group:** Randall Richwine & Tearani Williams / Penny Pazier. **Texas Tech University Health Sciences Center in El Paso:** Edward Michelson / Susan Watts / Diluma Kariyawasam / Leann Rodriguez. **The Angel Medical Research:** Jose Luis Garcia & Ismarys Manresa / Angel Achong & Mari Garcia. **The Heart and Medical Center:** Sangeeta Khetpal/Faith Posey. **Trident Health Center:** Arvind Mahadevan / Santia Lima. **TriHealth, Inc:** Martin Gnoni. **UF Health Precision Health Research:** Carla VandeWeerd / Erica Sappington/ Mitchell Roberts. **UMass Memorial Medical Center:** Jennifer Wang, Melissa Adams, Xinyi Ding. **University Diagnostics and Treatment Clinic:** Mark D'Andrea / Mina Aziz. **University Medical Center- New Orleans:** Stephen Lim / Wayne Swink & Emily Bozant. **University of Cincinnati:** Margaret Powers-Fletcher / Delia Miller & Sylvere Mukunzi. **University of Florida Health:** Elizabeth Shenkman / Brittney Manning. **University of Florida-JAX-ASCENT:** Carmen Isache / Jennifer Bowman / Angelique Callaghan-Brown / Debra Martin. **University of Kansas – Wichita:** Tiffany Schwasinger-Schmidt / Ashley Ast / Brent Duran / Ashlie Cornejo / Allie Archer.

**University of Miami:** Dushyantha Jayaweera / Maria Almanzar / Vanessa Motel. **University of Minnesota:** Carolyn Bramante / Neeta Bhat / Daniela Parra / Dr. Matthew Pullen / Paula Campora. **University of Missouri – Columbia:** Matthew Robinson / Michelle Seithel. **University of Pittsburgh:** Akira Sekikawa / Emily Klawson / Jonathan Arnold. **University of Texas Health Science Center at Houston:** Luis Ostrosky-Zeichner / Virginia Umana / Laura Nielsen / Carolyn Z. Grimes. **University of Texas Health Science Center at San Antonio:** Thomas F. Patterson / Robin Tragus / Bridgette T. Soileau. **University of Virginia Health System:** Patrick E. H. Jackson / Caroline Hallowell / Heather M. Haughey. **Vaidya MD PLLC:** Bhavna Vaidya-Tank / Cameron Gould. **Vanderbilt University Medical Center:** Parul Goyal / Sue Sommers / Haley Pangburn / Carly Jones. **Wake Forest University Health Sciences:** John Williamson / Rica Abbott/ Hannah Seagle / Mathias DeComarmond. **Weill Cornell Medical College:** Matthew McCarthy / Nicholas Pickell & Unwana Umana & Candace Alleyne. **Well Pharma Medical Research:** Eddie Armas, Ramon O. Perez Landaburo, Michelle De La Cruz, Martha Ballmajo.

## Supplemental Methods

### Participant Monitoring

The daily and follow-up assessments were monitored, and sites were actively notified of events requiring review, including serious adverse events (SAEs). In addition, participants were invited during assessments to request contact from the study team or to report any unusual circumstances. Failure to complete daily assessments also triggered a review for any possible SAEs. A missed assessment on the day after receiving the first dose of study medication (day 2) or any day of missed assessments up to day 14 prompted a notification to the site to contact the participant. All participants were instructed to self-report concerns either via an online event reporting system, by calling the site, or by calling a 24-hour hotline. Hospitalizations, a record of seeking other healthcare, or serious adverse events were extracted by site personnel from the participant's medical record. Medical occurrences occurring before the receipt of study drug/placebo but after obtaining informed consent were not considered an adverse event.

### Independent Data Monitoring Committee Oversight

Interim analyses were planned at intervals of approximately 300 participants contributing to a study drug group, with an anticipated maximum of 1200 participants. There was also the potential to extend accrual for a study drug if there was potential to demonstrate benefit for hospitalization/death. Due to extremely rapid enrollment, the last planned interim analysis was not conducted. The independent data monitoring committee reviewed interim data when approximately 300 and 600 participants with primary endpoint data, resulting in a planned primary analysis highly conservative of type 1 error. To provide additional context, the primary analysis was additionally performed with a non-informative prior and without a prior.

### Handling of Missing Data

In both the primary and secondary endpoint analyses, missing data among covariates was addressed with conditional mean imputation because the amount of missing covariate data was small. Approximately 5–7% of participants did not report activity level for the COVID clinical progression score endpoint at each time point, but the participants were known to be alive and at home. The missing activity level was a type of interval censored outcome, as the participants were known to be either a 1 or 2 on the scale. The ordinal regression models were fit accounting for the interval censoring.

### Proportional Hazards

The proportional hazards assumption of the primary endpoint was evaluated by generating visual diagnostics such as the log-log plot and plots of time-dependent regression coefficients for each predictor in the model, a diagnostic which indicates deviations from proportionality if the time-dependent coefficients are not constant in time.

### Heterogeneity of Treatment Effect Analysis

For each characteristic, a proportional hazards regression model was constructed using the same covariates as the primary endpoint model plus additional interaction terms between treatment assignment and the characteristic of interest. To allow the possibility of non-linear trends along continuous characteristics, like age or calendar time, continuous covariates were included in the model as restricted cubic splines. The hazard ratios and 95% confidence intervals were calculated from asymptotic, model-based estimates at specific values. The continuous variables were not discretized into bins (or groups).

## COVID-19 Ordinal Outcome Scale

The COVID-19 outcomes for this trial are based on the World Health Organization's Ordinal Scale for Clinical Improvement and will be collected via the online system and from the medical record. The following outcomes will be assessed as part of the COVID Clinical Progression Scale:

0. No clinical or virological evidence of infection
1. No limitation of activities
2. Limitation of activities
3. Hospitalized, no oxygen therapy
4. Hospitalized, on oxygen by mask or nasal prongs
5. Hospitalized, on non-invasive ventilation or high-flow oxygen
6. Hospitalized, on intubation and mechanical ventilation
7. Hospitalized, on ventilation + additional organ support – pressors, renal replacement therapy, extracorporeal membrane oxygenation
8. Death

eTable 1. Baseline symptom prevalence and severity

| Variable                                                    | Fluvoxamine<br>(n=589) | Placebo<br>(n=586) | Overall<br>(n=1175) |
|-------------------------------------------------------------|------------------------|--------------------|---------------------|
| <b>Overall symptom burden on study day 1, No./total (%)</b> |                        |                    |                     |
| None                                                        | 54/542 (9.96)          | 46/542 (8.49)      | 100/1084 (9.23)     |
| Mild                                                        | 289/542 (53.32)        | 291/542 (53.69)    | 580/1084 (53.51)    |
| Moderate                                                    | 197/542 (36.35)        | 198/542 (36.53)    | 395/1084 (36.44)    |
| Severe                                                      | 2/542 (0.37)           | 7/542 (1.29)       | 9/1084 (0.83)       |
| <b>Symptoms on study day 1</b>                              |                        |                    |                     |
| <b>Fatigue, No./total (%)</b>                               |                        |                    |                     |
| None                                                        | 80/488 (16.39)         | 105/496 (21.17)    | 185/984 (18.80)     |
| Mild                                                        | 230/488 (47.13)        | 212/496 (42.74)    | 442/984 (44.92)     |
| Moderate                                                    | 166/488 (34.02)        | 162/496 (32.66)    | 328/984 (33.33)     |
| Severe                                                      | 12/488 (2.46)          | 17/496 (3.43)      | 29/984 (2.95)       |
| <b>Dyspnea, No./total (%)</b>                               |                        |                    |                     |
| None                                                        | 322/487 (66.12)        | 315/496 (63.51)    | 637/983 (64.80)     |
| Mild                                                        | 131/487 (26.90)        | 139/496 (28.02)    | 270/983 (27.47)     |
| Moderate                                                    | 33/487 (6.78)          | 35/496 (7.06)      | 68/983 (6.92)       |
| Severe                                                      | 1/487 (0.21)           | 7/496 (1.41)       | 8/983 (0.81)        |
| <b>Fever, No./total (%)</b>                                 |                        |                    |                     |
| None                                                        | 373/488 (76.43)        | 374/496 (75.40)    | 747/984 (75.91)     |
| Mild                                                        | 85/488 (17.42)         | 81/496 (16.33)     | 166/984 (16.87)     |
| Moderate                                                    | 29/488 (5.94)          | 40/496 (8.06)      | 69/984 (7.01)       |
| Severe                                                      | 1/488 (0.20)           | 1/496 (0.20)       | 2/984 (0.20)        |
| <b>Cough, No./total (%)</b>                                 |                        |                    |                     |
| None                                                        | 81/488 (16.60)         | 106/496 (21.37)    | 187/984 (19.00)     |
| Mild                                                        | 222/488 (45.49)        | 229/496 (46.17)    | 451/984 (45.83)     |
| Moderate                                                    | 171/488 (35.04)        | 147/496 (29.64)    | 318/984 (32.32)     |
| Severe                                                      | 14/488 (2.87)          | 14/496 (2.82)      | 28/984 (2.85)       |
| <b>Nausea, No./total (%)</b>                                |                        |                    |                     |
| None                                                        | 357/488 (73.16)        | 409/496 (82.46)    | 766/984 (77.85)     |
| Mild                                                        | 98/488 (20.08)         | 64/496 (12.90)     | 162/984 (16.46)     |
| Moderate                                                    | 28/488 (5.74)          | 22/496 (4.44)      | 50/984 (5.08)       |
| Severe                                                      | 5/488 (1.02)           | 1/496 (0.20)       | 6/984 (0.61)        |
| <b>Vomiting, No./total (%)</b>                              |                        |                    |                     |
| None                                                        | 460/487 (94.46)        | 476/496 (95.97)    | 936/983 (95.22)     |
| Mild                                                        | 21/487 (4.31)          | 14/496 (2.82)      | 35/983 (3.56)       |
| Moderate                                                    | 5/487 (1.03)           | 6/496 (1.21)       | 11/983 (1.12)       |
| Severe                                                      | 1/487 (0.21)           | 0/496 (0.00)       | 1/983 (0.10)        |
| <b>Diarrhea, No./total (%)</b>                              |                        |                    |                     |
| None                                                        | 390/488 (79.92)        | 399/496 (80.44)    | 789/984 (80.18)     |
| Mild                                                        | 72/488 (14.75)         | 80/496 (16.13)     | 152/984 (15.45)     |
| Moderate                                                    | 22/488 (4.51)          | 16/496 (3.23)      | 38/984 (3.86)       |
| Severe                                                      | 4/488 (0.82)           | 1/496 (0.20)       | 5/984 (0.51)        |
| <b>Body aches, No./total (%)</b>                            |                        |                    |                     |
| None                                                        | 147/488 (30.12)        | 162/496 (32.66)    | 309/984 (31.40)     |
| Mild                                                        | 221/488 (45.29)        | 187/496 (37.70)    | 408/984 (41.46)     |
| Moderate                                                    | 111/488 (22.75)        | 140/496 (28.23)    | 251/984 (25.51)     |
| Severe                                                      | 9/488 (1.84)           | 7/496 (1.41)       | 16/984 (1.63)       |
| <b>Sore throat, No./total (%)</b>                           |                        |                    |                     |
| None                                                        | 229/488 (46.93)        | 238/496 (47.98)    | 467/984 (47.46)     |
| Mild                                                        | 169/488 (34.63)        | 172/496 (34.68)    | 341/984 (34.65)     |
| Moderate                                                    | 80/488 (16.39)         | 78/496 (15.73)     | 158/984 (16.06)     |
| Severe                                                      | 10/488 (2.05)          | 8/496 (1.61)       | 18/984 (1.83)       |
| <b>Headache, No./total (%)</b>                              |                        |                    |                     |
| None                                                        | 213/488 (43.65)        | 232/496 (46.77)    | 445/984 (45.22)     |
| Mild                                                        | 188/488 (38.52)        | 165/496 (33.27)    | 353/984 (35.87)     |
| Moderate                                                    | 76/488 (15.57)         | 84/496 (16.94)     | 160/984 (16.26)     |
| Severe                                                      | 11/488 (2.25)          | 15/496 (3.02)      | 26/984 (2.64)       |

| Variable                                                  | Fluvoxamine<br>(n=589) | Placebo<br>(n=586) | Overall<br>(n=1175) |
|-----------------------------------------------------------|------------------------|--------------------|---------------------|
| <b>Chills, No./total (%)</b>                              |                        |                    |                     |
| None                                                      | 361/488 (73.98)        | 380/496 (76.61)    | 741/984 (75.30)     |
| Mild                                                      | 89/488 (18.24)         | 82/496 (16.53)     | 171/984 (17.38)     |
| Moderate                                                  | 35/488 (7.17)          | 33/496 (6.65)      | 68/984 (6.91)       |
| Severe                                                    | 3/488 (0.61)           | 1/496 (0.20)       | 4/984 (0.41)        |
| <b>Nasal symptoms, No./total (%)</b>                      |                        |                    |                     |
| None                                                      | 181/488 (37.09)        | 190/496 (38.31)    | 371/984 (37.70)     |
| Mild                                                      | 178/488 (36.48)        | 192/496 (38.71)    | 370/984 (37.60)     |
| Moderate                                                  | 119/488 (24.39)        | 102/496 (20.56)    | 221/984 (22.46)     |
| Severe                                                    | 10/488 (2.05)          | 12/496 (2.42)      | 22/984 (2.24)       |
| <b>New loss of sense of taste or smell, No./total (%)</b> |                        |                    |                     |
| None                                                      | 321/488 (65.78)        | 341/496 (68.75)    | 662/984 (67.28)     |
| Mild                                                      | 103/488 (21.11)        | 82/496 (16.53)     | 185/984 (18.80)     |
| Moderate                                                  | 43/488 (8.81)          | 42/496 (8.47)      | 85/984 (8.64)       |
| Severe                                                    | 21/488 (4.30)          | 31/496 (6.25)      | 52/984 (5.28)       |

eTable 2. Serious adverse events

| Variable                                    | Measure | Fluvoxamine | Placebo | Overall |
|---------------------------------------------|---------|-------------|---------|---------|
| <b>Serious adverse events</b>               | N       |             |         |         |
| <b>Asthma aggravated</b>                    |         | 1           | 0       | 1       |
| <b>Community acquired pneumonia</b>         |         | 1           | 0       | 1       |
| <b>Guillain-Barre syndrome</b>              |         | 1           | 0       | 1       |
| <b>Ruptured appendix</b>                    |         | 0           | 1       | 1       |
| <b>Diabetic ulcer NOS</b>                   |         | 0           | 1       | 1       |
| <b>Partial bowel obstruction</b>            |         | 0           | 1       | 1       |
| <b>Diverticulitis intestinal perforated</b> |         | 0           | 1       | 1       |

eFigure 1. Time from symptom onset to receipt of drug

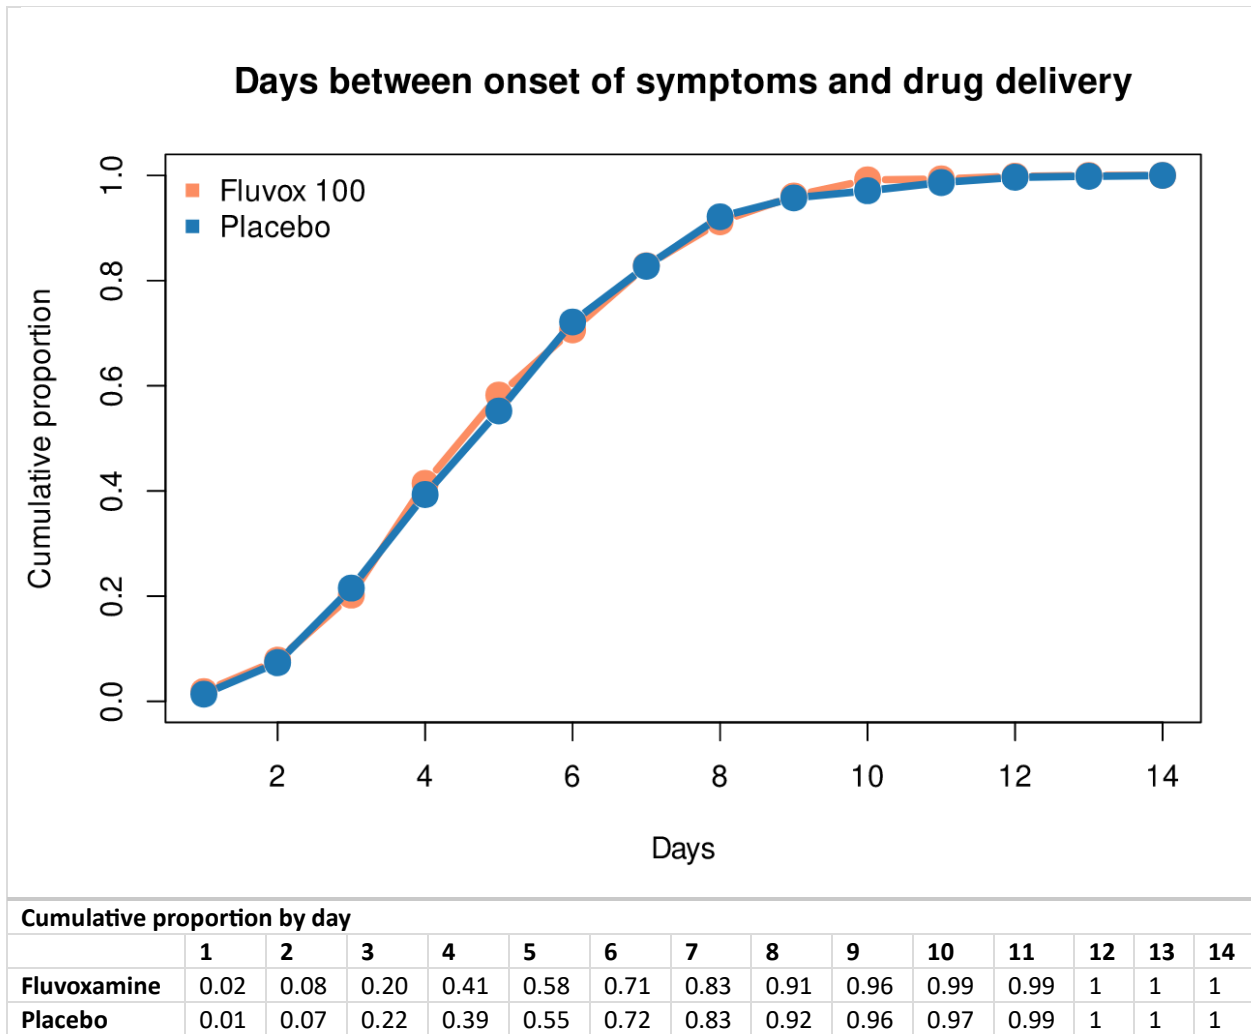



eFigure 2. Sensitivity analysis of time to sustained recovery

### Sensitivity analyses

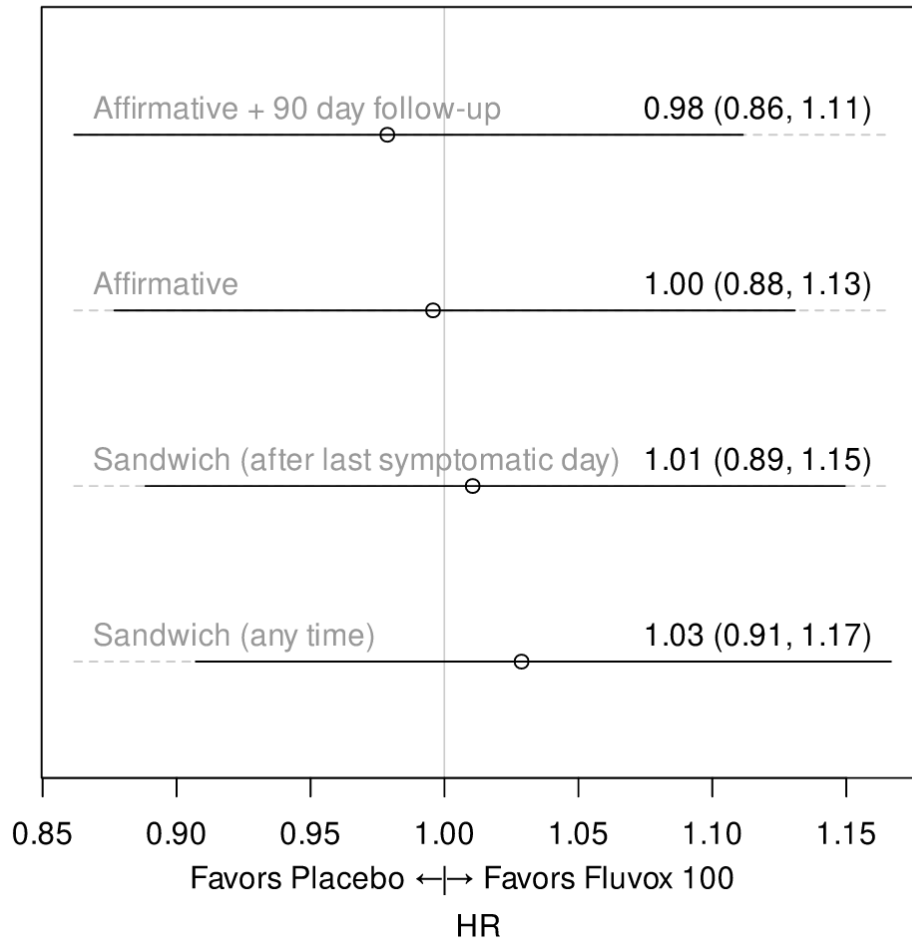

Sustained recovery is three consecutive symptom-free days. This figure illustrates the treatment effect estimate for different strategies of handling missing patient responses. The primary "Affirmative + 90 day follow-up" definition assumes that participants are symptomatic on the days without a response. The strategy does not censor recovery times earlier than day 28 if the day 90 survey is provided. The "Affirmative" assumes the same about days without a response. It differs for the primary definition in that follow-up is only based on responses during the first 28 days. A participant that fails to respond to surveys after day 14 is censored at day 14. The second and third alternatives are imputation strategies, treating missing responses as symptom-free days if surrounded by symptom-free days. For instance, if a participant lacked a day two response but reported no symptoms on days one and three, the "Sandwich" definition marks the missing day as "no symptoms." The "Sandwich after last symptomatic day" definition only applies this rule after the last reported symptomatic day.

The hazard ratios in the figure are from the covariate-adjusted, proportional hazards regression model without prior. Notably, irrespective of the sustained recovery definition, the treatment effect remains largely consistent.

eFigure 3. All-cause hospitalization or death for fluvoxamine vs placebo

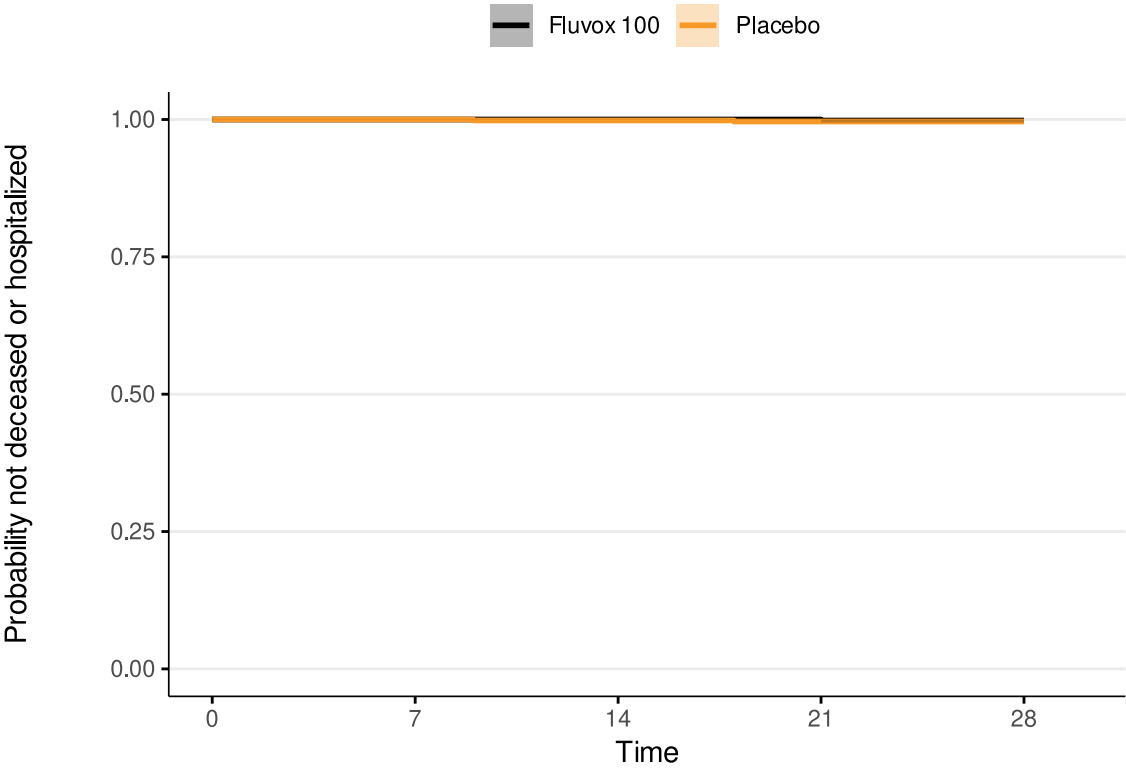

No. at risk

|            |     |     |     |     |     |
|------------|-----|-----|-----|-----|-----|
| Fluvox 100 | 589 | 549 | 539 | 536 | 533 |
| Placebo    | 586 | 562 | 554 | 547 | 540 |

eFigure 4. All-cause hospitalization, urgent care, emergency department visit, or death for fluvoxamine versus placebo

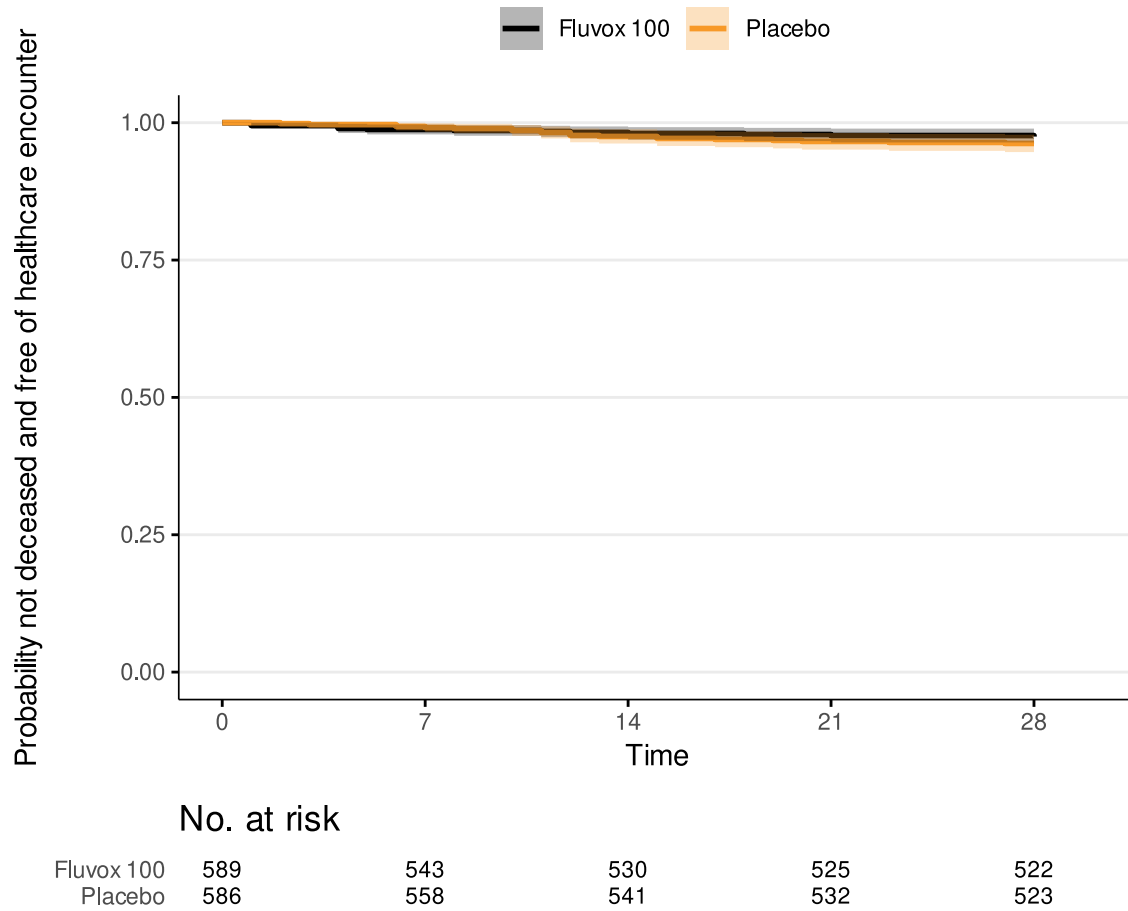

eFigure 5. Participants' COVID clinical progression scale at day 7, 14, and 28

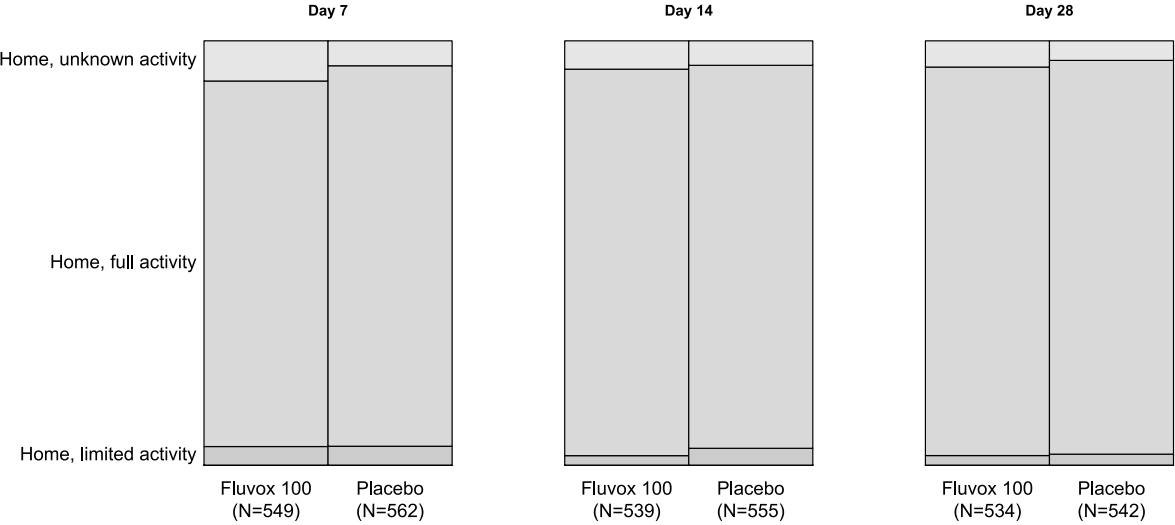

eFigure 6. Kaplan-Meier curves of sustained recovery by onset of symptoms and symptom severity

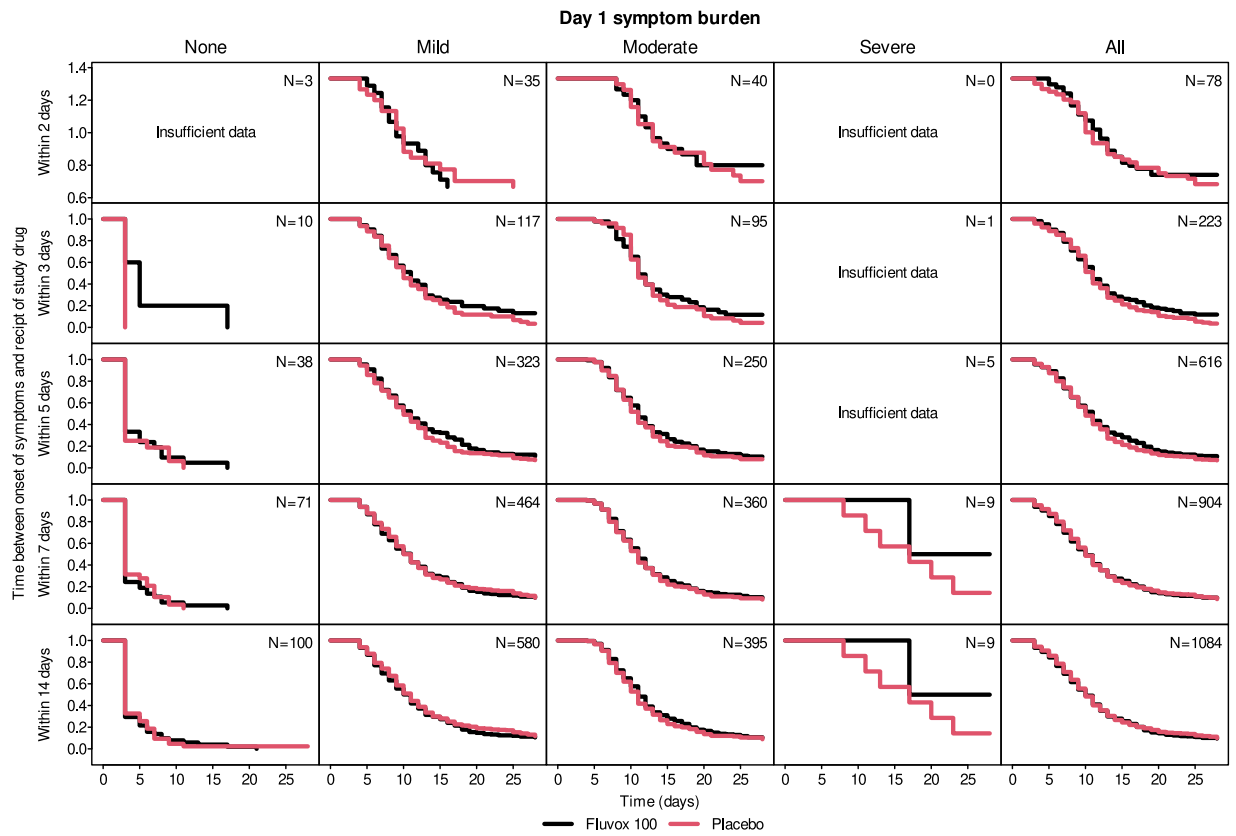

eFigure 7. Heterogeneity of treatment effect between fluvoxamine and placebo for time to recovery

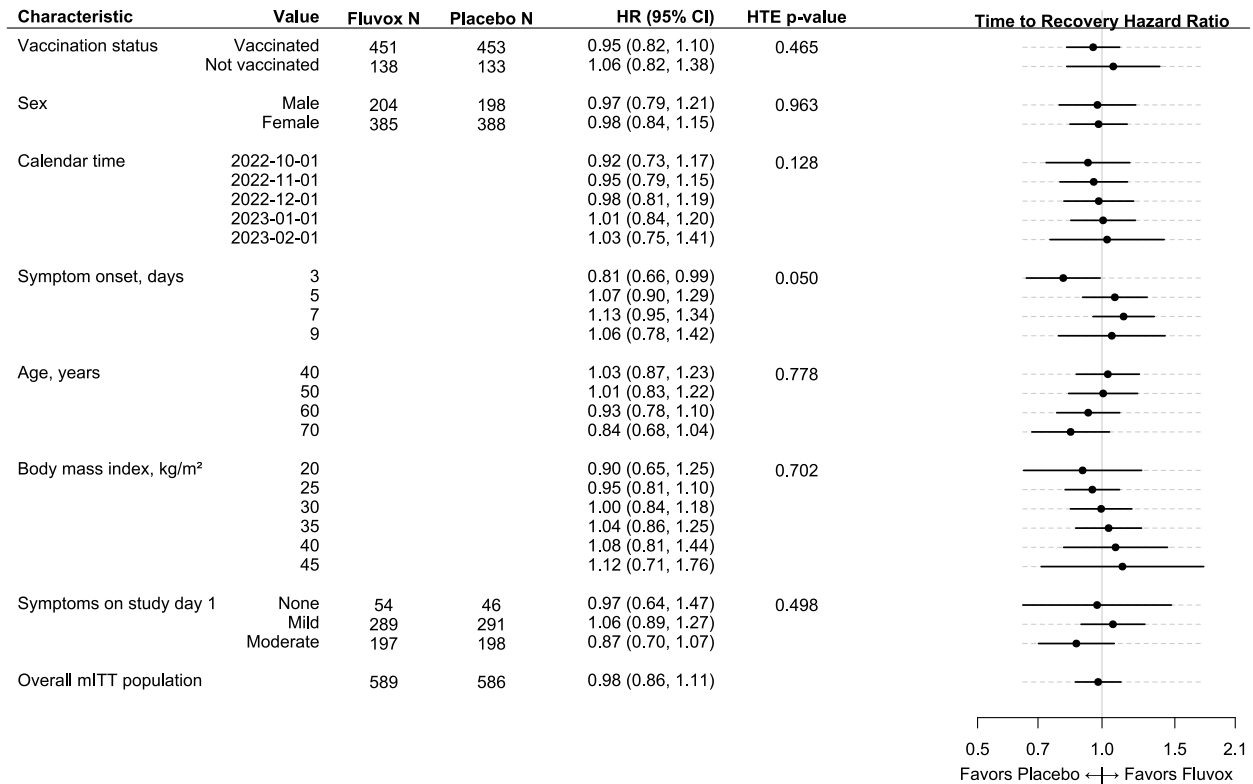

This figure presents the analyses exploring heterogeneity of treatment effect derived from the primary endpoint—time to sustained recovery. These exploratory analyses, outlined in the statistical analysis plan, did not undergo multiplicity adjustment. A hazard ratio larger than 1 signifies an accelerated recovery. Study day 1 corresponds to the participant's drug delivery day.

For each characteristic, a proportional hazards regression model was constructed using the same covariates as the primary endpoint model plus additional interaction terms between treatment assignment and the characteristic of interest. For example, the interaction of vaccination status and treatment assignment was added to the primary endpoint regression model to calculate a treatment effect for the vaccinated and unvaccinated subgroups.

To allow the possibility of non-linear trends along continuous characteristics, like age or calendar time, the additional terms were interactions between treatment assignment and restricted cubic splines. Because the primary endpoint model did not include body mass index (BMI), the restricted cubic spline terms for BMI were also added to the model (sometimes call main effects) in addition to the interaction terms. Because the primary endpoint model only included a single linear term for symptom onset, the nonlinear terms of the restricted cubic spline were also added to the model in addition to the interaction terms. The hazard ratios and 95% confidence intervals were calculated from asymptotic, model-based contrasts.

The hazard ratio for the full study population was generated from the primary endpoint model without prior adjustments. The estimates shown in the HTE plot are estimates calculated from the smooth, modeled relationship. For the continuous characteristics, there are no discrete categories or ranges or bins over which to tabulate the number of participants.

eFigure 8. Kaplan-Meier curves of time to recovery stratified by symptom onset

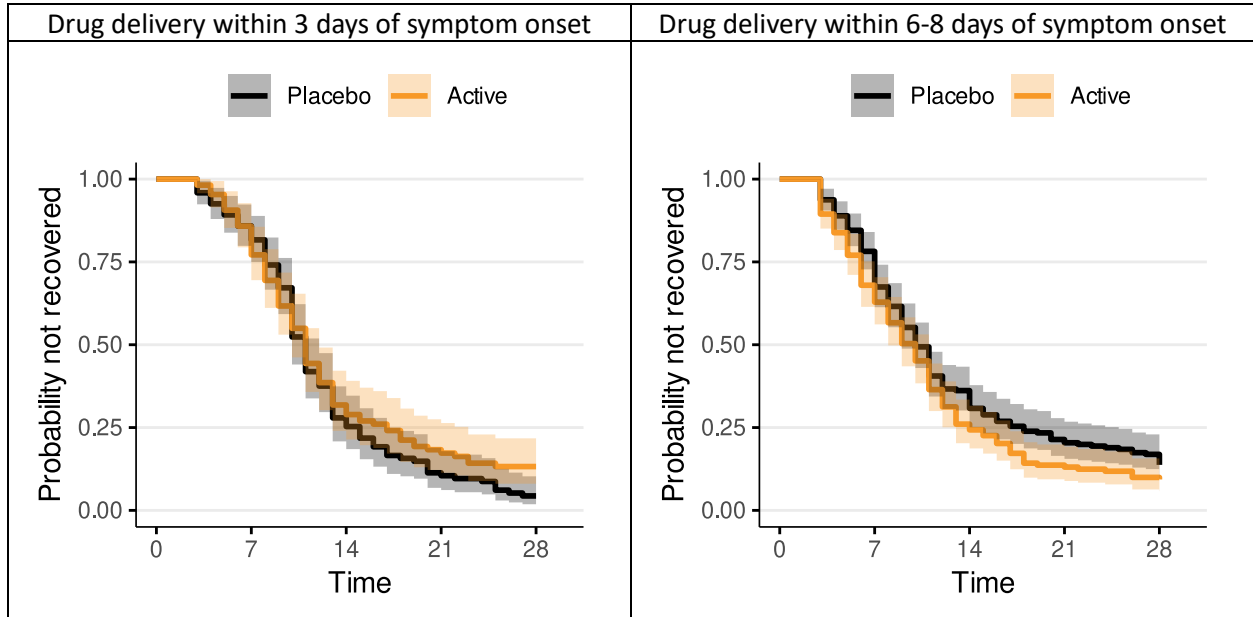

eFigure 9. Posterior densities of primary endpoint model

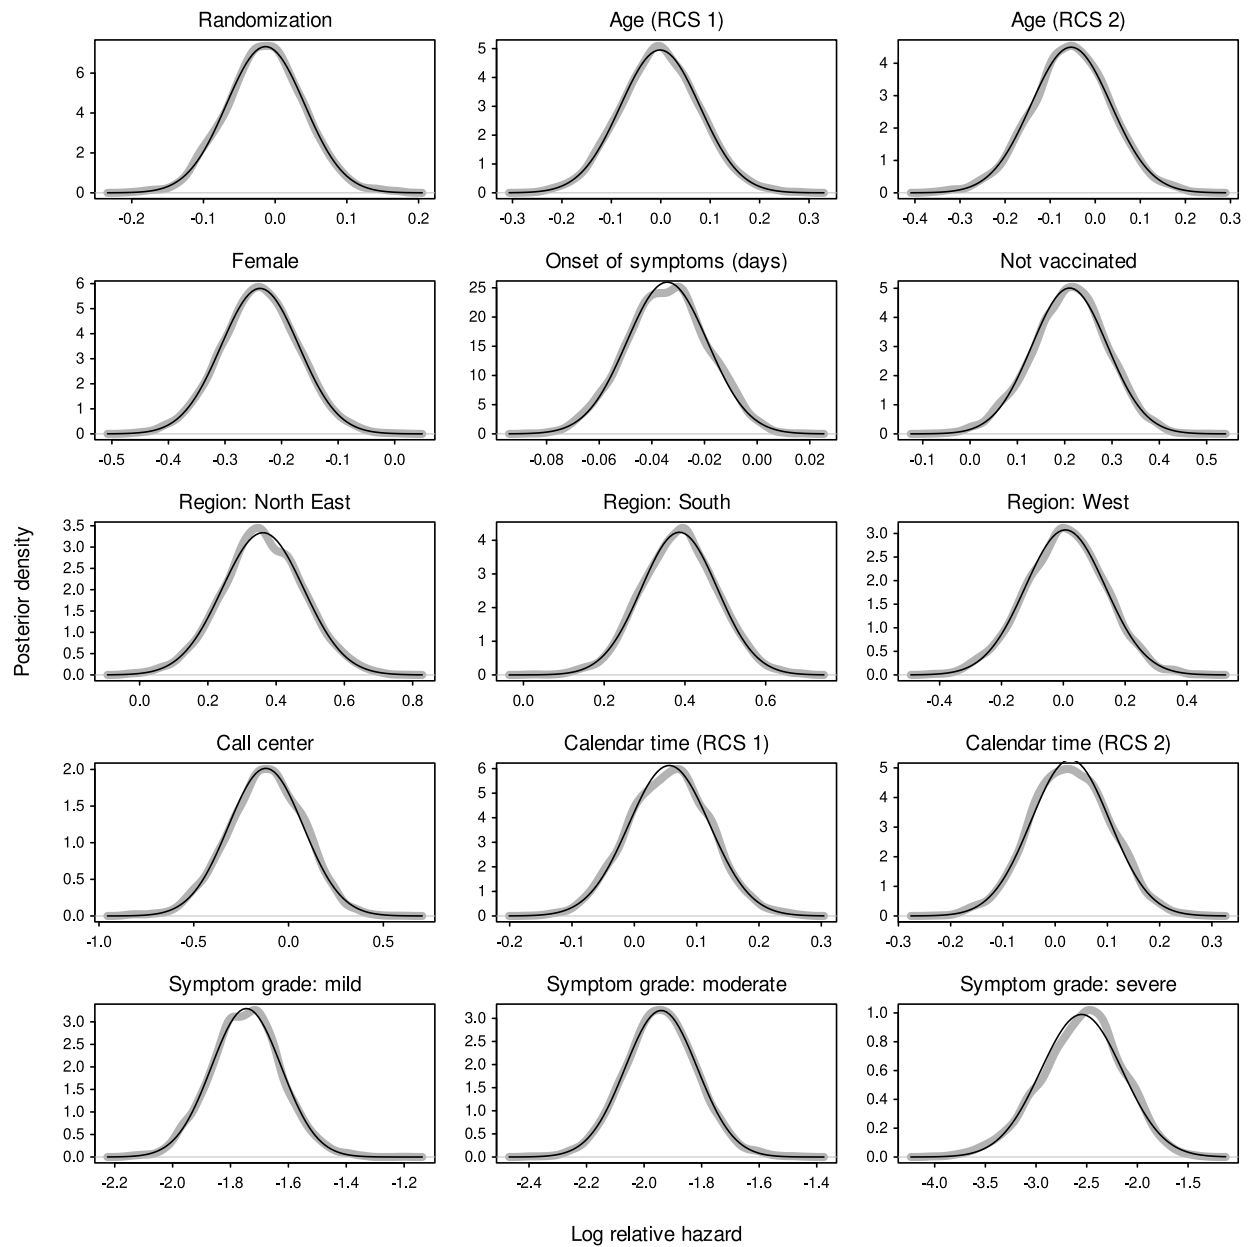

This figure provides the posterior densities of each regression coefficient in the primary endpoint model. The x-axis is the log relative hazard; the y-axis is density. The thick, grey lines are the kernel density estimates; thin, black lines represent parametric normal density estimates of the same.
