# Supplementary material
Source: PubMed Central journal article supplement (PMC10656670)
Supplement: jama-e2323363-s004.pdf [file jama-e2323363-s004.pdf]

\*First name, last name, and suffix (if applicable) are required and will appear in PubMed.

| <b>*Group Name(s): Accelerating COVID-19 Therapeutic Interventions and Vaccines (ACTIV)-6 Study Group and Investigators</b> |                   |                              |                  |             |                                          |                                                         |                                                                                            |
|-----------------------------------------------------------------------------------------------------------------------------|-------------------|------------------------------|------------------|-------------|------------------------------------------|---------------------------------------------------------|--------------------------------------------------------------------------------------------|
| <b>*First Name and Middle Initial(s)</b>                                                                                    | <b>*Last Name</b> | <b>*Suffix (eg, Jr, III)</b> | Academic Degrees | Institution | Location (city, state/province, country) | Role or Contribution, eg, chair, principal investigator | Group (if more than 1 Group listed in the byline) and/or Subgroup (eg, Steering Committee) |
| Ryan                                                                                                                        | Fraser            |                              |                  |             |                                          |                                                         |                                                                                            |
| Mark                                                                                                                        | Ward              |                              |                  |             |                                          |                                                         |                                                                                            |
| Jennifer                                                                                                                    | Gamboa Jackman    |                              |                  |             |                                          |                                                         |                                                                                            |
| M. Patricia                                                                                                                 | McAdams           |                              |                  |             |                                          |                                                         |                                                                                            |
| Julia                                                                                                                       | Vail              |                              |                  |             |                                          |                                                         |                                                                                            |
| Kayla                                                                                                                       | Korzekwinski      |                              |                  |             |                                          |                                                         |                                                                                            |
| Martina                                                                                                                     | Oyelakin          |                              |                  |             |                                          |                                                         |                                                                                            |
| Julie                                                                                                                       | Chopp             |                              |                  |             |                                          |                                                         |                                                                                            |
| Desmon                                                                                                                      | Randle            |                              |                  |             |                                          |                                                         |                                                                                            |
| Samantha                                                                                                                    | Dockery           |                              |                  |             |                                          |                                                         |                                                                                            |
| Rodney                                                                                                                      | Adkins            |                              |                  |             |                                          |                                                         |                                                                                            |
| Mathew                                                                                                                      | Crow              |                              |                  |             |                                          |                                                         |                                                                                            |
| Erin                                                                                                                        | Nowell            |                              |                  |             |                                          |                                                         |                                                                                            |
| Kadie                                                                                                                       | Wells             |                              |                  |             |                                          |                                                         |                                                                                            |
| Alicia                                                                                                                      | Herbert           |                              |                  |             |                                          |                                                         |                                                                                            |
| Allegra                                                                                                                     | Stone             |                              |                  |             |                                          |                                                         |                                                                                            |
| Heather                                                                                                                     | Heavlin           |                              |                  |             |                                          |                                                         |                                                                                            |
| Linley                                                                                                                      | Brown             |                              |                  |             |                                          |                                                         |                                                                                            |
| Tina                                                                                                                        | Harding           |                              |                  |             |                                          |                                                         |                                                                                            |
| Amanda                                                                                                                      | Harrington        |                              |                  |             |                                          |                                                         |                                                                                            |
| Meaghan                                                                                                                     | Beauchaine        |                              |                  |             |                                          |                                                         |                                                                                            |
| Kelly                                                                                                                       | Lindblom          |                              |                  |             |                                          |                                                         |                                                                                            |
| Andrea                                                                                                                      | Burns             |                              |                  |             |                                          |                                                         |                                                                                            |
| David                                                                                                                       | Aamodt            |                              |                  |             |                                          |                                                         |                                                                                            |
| Jess                                                                                                                        | Collins           |                              |                  |             |                                          |                                                         |                                                                                            |
| Sheri                                                                                                                       | Dixon             |                              |                  |             |                                          |                                                         |                                                                                            |
| Yue                                                                                                                         | Gao               |                              |                  |             |                                          |                                                         |                                                                                            |
| John                                                                                                                        | Graves            |                              |                  |             |                                          |                                                         |                                                                                            |
| James                                                                                                                       | Grindstaff        |                              |                  |             |                                          |                                                         |                                                                                            |
| Frank                                                                                                                       | Harrell           |                              |                  |             |                                          |                                                         |                                                                                            |
| Jessica                                                                                                                     | Lai               |                              |                  |             |                                          |                                                         |                                                                                            |
| Vicky                                                                                                                       | Liao              |                              |                  |             |                                          |                                                         |                                                                                            |

## Supplemental Online Content: Nonauthor Collaborators

\*First name, last name, and suffix (if applicable) are required and will appear in PubMed.

| *First Name and Middle Initial(s) | *Last Name       | *Suffix (eg, Jr, III) | Academic Degrees | Institution | Location (city, state/province, country) | Role or Contribution, eg, chair, principal investigator | Group (if more than 1 Group listed in the byline) and/or Subgroup (eg, Steering Committee) |
|-----------------------------------|------------------|-----------------------|------------------|-------------|------------------------------------------|---------------------------------------------------------|--------------------------------------------------------------------------------------------|
| Itzel                             | Lopez            |                       |                  |             |                                          |                                                         |                                                                                            |
| Elizabeth                         | Manis            |                       |                  |             |                                          |                                                         |                                                                                            |
| Kalley                            | Mankowski        |                       |                  |             |                                          |                                                         |                                                                                            |
| Jessica                           | Marlin           |                       |                  |             |                                          |                                                         |                                                                                            |
| Alyssa                            | Merkel           |                       |                  |             |                                          |                                                         |                                                                                            |
| Sam                               | Nwosu            |                       |                  |             |                                          |                                                         |                                                                                            |
| Savannah                          | Obregon          |                       |                  |             |                                          |                                                         |                                                                                            |
| Dirk                              | Orozco           |                       |                  |             |                                          |                                                         |                                                                                            |
| Nelson                            | Prato            |                       |                  |             |                                          |                                                         |                                                                                            |
| Max                               | Rohde            |                       |                  |             |                                          |                                                         |                                                                                            |
| Jana                              | Shirey-Rice      |                       |                  |             |                                          |                                                         |                                                                                            |
| Krista                            | Vermillion       |                       |                  |             |                                          |                                                         |                                                                                            |
| Jacob                             | Smith            |                       |                  |             |                                          |                                                         |                                                                                            |
| Hsi-nien                          | Tan              |                       |                  |             |                                          |                                                         |                                                                                            |
| Meghan                            | Vance            |                       |                  |             |                                          |                                                         |                                                                                            |
| Maria                             | Weir             |                       |                  |             |                                          |                                                         |                                                                                            |
| William (Kelly)                   | Vincent          |                       |                  |             |                                          |                                                         |                                                                                            |
| Raina                             | Vincent          |                       |                  |             |                                          |                                                         |                                                                                            |
| Ray                               | Bianchi          |                       |                  |             |                                          |                                                         |                                                                                            |
| Jen                               | Premas           |                       |                  |             |                                          |                                                         |                                                                                            |
| Diana                             | Cordero-Loperena |                       |                  |             |                                          |                                                         |                                                                                            |
| Evelyn                            | Rivera           |                       |                  |             |                                          |                                                         |                                                                                            |
| Madhu                             | Gupta            |                       |                  |             |                                          |                                                         |                                                                                            |
| Greg                              | Karawan          |                       |                  |             |                                          |                                                         |                                                                                            |
| Joseph                            | Arena            |                       |                  |             |                                          |                                                         |                                                                                            |
| Sonaly                            | DeAlmeida        |                       |                  |             |                                          |                                                         |                                                                                            |
| Soroush                           | Ramin            |                       |                  |             |                                          |                                                         |                                                                                            |
| Jaya                              | Nataraj          |                       |                  |             |                                          |                                                         |                                                                                            |
| Julien                            | Dedier           |                       |                  |             |                                          |                                                         |                                                                                            |
| Ana Maria                         | Ramirez          |                       |                  |             |                                          |                                                         |                                                                                            |
| Katherine                         | Waite            |                       |                  |             |                                          |                                                         |                                                                                            |
| Jason                             | Okulicz          |                       |                  |             |                                          |                                                         |                                                                                            |
| Joseph                            | Marcus           |                       |                  |             |                                          |                                                         |                                                                                            |

## Supplemental Online Content: Nonauthor Collaborators

\*First name, last name, and suffix (if applicable) are required and will appear in PubMed.

| *First Name and Middle Initial(s) | *Last Name     | *Suffix (eg, Jr, III) | Academic Degrees | Institution | Location (city, state/province, country) | Role or Contribution, eg, chair, principal investigator | Group (if more than 1 Group listed in the byline) and/or Subgroup (eg, Steering Committee) |
|-----------------------------------|----------------|-----------------------|------------------|-------------|------------------------------------------|---------------------------------------------------------|--------------------------------------------------------------------------------------------|
| Alexis                            | Southwell      |                       |                  |             |                                          |                                                         |                                                                                            |
| Genice                            | Jacques        |                       |                  |             |                                          |                                                         |                                                                                            |
| Cedar                             | Sexton         |                       |                  |             |                                          |                                                         |                                                                                            |
| David                             | Miller         |                       |                  |             |                                          |                                                         |                                                                                            |
| Ginger                            | Brounce        |                       |                  |             |                                          |                                                         |                                                                                            |
| Constance                         | George-Adebayo |                       |                  |             |                                          |                                                         |                                                                                            |
| Adeolu                            | Adebayo        |                       |                  |             |                                          |                                                         |                                                                                            |
| Jose                              | Zapatero       |                       |                  |             |                                          |                                                         |                                                                                            |
| Julie                             | Clement        |                       |                  |             |                                          |                                                         |                                                                                            |
| Theresa                           | Ronan          |                       |                  |             |                                          |                                                         |                                                                                            |
| Ashley                            | Woods          |                       |                  |             |                                          |                                                         |                                                                                            |
| Christopher                       | Gallegos       |                       |                  |             |                                          |                                                         |                                                                                            |
| Tamara                            | Flys           |                       |                  |             |                                          |                                                         |                                                                                            |
| Olivia                            | Sloan          |                       |                  |             |                                          |                                                         |                                                                                            |
| Anthony                           | Olofintuyi     |                       |                  |             |                                          |                                                         |                                                                                            |
| Joshua                            | Samraj         |                       |                  |             |                                          |                                                         |                                                                                            |
| Jackelyn                          | Samraj         |                       |                  |             |                                          |                                                         |                                                                                            |
| Alma                              | Vasbinder      |                       |                  |             |                                          |                                                         |                                                                                            |
| Amaya                             | Averett        |                       |                  |             |                                          |                                                         |                                                                                            |
| Alex                              | Slandzicki     |                       |                  |             |                                          |                                                         |                                                                                            |
| Aaron                             | Milstone       |                       |                  |             |                                          |                                                         |                                                                                            |
| Jessica                           | Wallan         |                       |                  |             |                                          |                                                         |                                                                                            |
| Lindsey                           | Robbs          |                       |                  |             |                                          |                                                         |                                                                                            |
| Claudia                           | Vogel          |                       |                  |             |                                          |                                                         |                                                                                            |
| Sebastian                         | Munoz          |                       |                  |             |                                          |                                                         |                                                                                            |
| David                             | Kavtaradze     |                       |                  |             |                                          |                                                         |                                                                                            |
| Casandra                          | Watson         |                       |                  |             |                                          |                                                         |                                                                                            |
| David                             | Singleton      |                       |                  |             |                                          |                                                         |                                                                                            |
| Marcus                            | Sevier         |                       |                  |             |                                          |                                                         |                                                                                            |
| Maria                             | Rivon          |                       |                  |             |                                          |                                                         |                                                                                            |
| Arnold                            | Del Pilar      |                       |                  |             |                                          |                                                         |                                                                                            |
| Amber                             | Spangler       |                       |                  |             |                                          |                                                         |                                                                                            |
| Sohail                            | Rao            |                       |                  |             |                                          |                                                         |                                                                                            |

Supplemental Online Content: Nonauthor Collaborators

\*First name, last name, and suffix (if applicable) are required and will appear in PubMed.

| *First Name and Middle Initial(s) | *Last Name   | *Suffix (eg, Jr, III) | Academic Degrees | Institution | Location (city, state/province, country) | Role or Contribution, eg, chair, principal investigator | Group (if more than 1 Group listed in the byline) and/or Subgroup (eg, Steering Committee) |
|-----------------------------------|--------------|-----------------------|------------------|-------------|------------------------------------------|---------------------------------------------------------|--------------------------------------------------------------------------------------------|
| Luis                              | Cantu        |                       |                  |             |                                          |                                                         |                                                                                            |
| Arvind                            | Krishna      |                       |                  |             |                                          |                                                         |                                                                                            |
| Heidi                             | Daugherty    |                       |                  |             |                                          |                                                         |                                                                                            |
| Brandi                            | Kerr         |                       |                  |             |                                          |                                                         |                                                                                            |
| Kathy                             | Evans        |                       |                  |             |                                          |                                                         |                                                                                            |
| Robert                            | Spees        |                       |                  |             |                                          |                                                         |                                                                                            |
| Maily                             | Marta        |                       |                  |             |                                          |                                                         |                                                                                            |
| Meaghan                           | Beauchaine   |                       |                  |             |                                          |                                                         |                                                                                            |
| Rowena                            | Dolor        |                       |                  |             |                                          |                                                         |                                                                                            |
| Lorraine                          | Vergara      |                       |                  |             |                                          |                                                         |                                                                                            |
| Jackie                            | Jordan       |                       |                  |             |                                          |                                                         |                                                                                            |
| Valencia                          | Burruss      |                       |                  |             |                                          |                                                         |                                                                                            |
| Terri                             | Hurst        |                       |                  |             |                                          |                                                         |                                                                                            |
| Igho                              | Otokun       |                       |                  |             |                                          |                                                         |                                                                                            |
| Paulina A.                        | Rebolledo    |                       |                  |             |                                          |                                                         |                                                                                            |
| Cecilia                           | Zhang        |                       |                  |             |                                          |                                                         |                                                                                            |
| Veronica E.                       | Smith        |                       |                  |             |                                          |                                                         |                                                                                            |
| Rajesh                            | Prabhu       |                       |                  |             |                                          |                                                         |                                                                                            |
| Krystal                           | Klicka       |                       |                  |             |                                          |                                                         |                                                                                            |
| Amber                             | Lightfeather |                       |                  |             |                                          |                                                         |                                                                                            |
| Vickie                            | James        |                       |                  |             |                                          |                                                         |                                                                                            |
| Marcella                          | Rogers       |                       |                  |             |                                          |                                                         |                                                                                            |
| Pradeep                           | Parihar      |                       |                  |             |                                          |                                                         |                                                                                            |
| De' Ambra                         | Torress      |                       |                  |             |                                          |                                                         |                                                                                            |
| Chukwuemeka                       | Oragwu       |                       |                  |             |                                          |                                                         |                                                                                            |
| Ngozi                             | Oguego       |                       |                  |             |                                          |                                                         |                                                                                            |
| Rajesh                            | Pillai       |                       |                  |             |                                          |                                                         |                                                                                            |
| Mustafa                           | Juma         |                       |                  |             |                                          |                                                         |                                                                                            |
| Ahab                              | Gabriel      |                       |                  |             |                                          |                                                         |                                                                                            |
| Emad                              | Ghaly        |                       |                  |             |                                          |                                                         |                                                                                            |
| Marian                            | Michal       |                       |                  |             |                                          |                                                         |                                                                                            |
| Michelle                          | Vasquez      |                       |                  |             |                                          |                                                         |                                                                                            |
| Angela                            | Mamon        |                       |                  |             |                                          |                                                         |                                                                                            |

Supplemental Online Content: Nonauthor Collaborators

\*First name, last name, and suffix (if applicable) are required and will appear in PubMed.

| *First Name and Middle Initial(s) | *Last Name  | *Suffix (eg, Jr, III) | Academic Degrees | Institution | Location (city, state/province, country) | Role or Contribution, eg, chair, principal investigator | Group (if more than 1 Group listed in the byline) and/or Subgroup (eg, Steering Committee) |
|-----------------------------------|-------------|-----------------------|------------------|-------------|------------------------------------------|---------------------------------------------------------|--------------------------------------------------------------------------------------------|
| Michelle                          | Sheets      |                       |                  |             |                                          |                                                         |                                                                                            |
| Gammal                            | Hassanien   |                       |                  |             |                                          |                                                         |                                                                                            |
| Samah                             | Ismail      |                       |                  |             |                                          |                                                         |                                                                                            |
| Yehia                             | Samir       |                       |                  |             |                                          |                                                         |                                                                                            |
| Andrew                            | Meltzer     |                       |                  |             |                                          |                                                         |                                                                                            |
| Soroush                           | Shahamatdar |                       |                  |             |                                          |                                                         |                                                                                            |
| Ryan S.                           | Heidish     |                       |                  |             |                                          |                                                         |                                                                                            |
| Scott                             | Brehaut     |                       |                  |             |                                          |                                                         |                                                                                            |
| Angelina                          | Roche       |                       |                  |             |                                          |                                                         |                                                                                            |
| Manisha                           | Mehta       |                       |                  |             |                                          |                                                         |                                                                                            |
| Nicole                            | Koppinger   |                       |                  |             |                                          |                                                         |                                                                                            |
| Jose                              | Baez        |                       |                  |             |                                          |                                                         |                                                                                            |
| Ivone                             | Pagan       |                       |                  |             |                                          |                                                         |                                                                                            |
| Dallal                            | Abdelsayed  |                       |                  |             |                                          |                                                         |                                                                                            |
| Mina                              | Aziz        |                       |                  |             |                                          |                                                         |                                                                                            |
| Philip                            | Robinson    |                       |                  |             |                                          |                                                         |                                                                                            |
| Grace                             | Lozinski    |                       |                  |             |                                          |                                                         |                                                                                            |
| Julie                             | Nguyen      |                       |                  |             |                                          |                                                         |                                                                                            |
| Alvin                             | Griffin     |                       |                  |             |                                          |                                                         |                                                                                            |
| Michael                           | Morris      |                       |                  |             |                                          |                                                         |                                                                                            |
| Nicole                            | Love        |                       |                  |             |                                          |                                                         |                                                                                            |
| Bonnie                            | Mattox      |                       |                  |             |                                          |                                                         |                                                                                            |
| Raykel                            | Martin      |                       |                  |             |                                          |                                                         |                                                                                            |
| Victoria                          | Pardue      |                       |                  |             |                                          |                                                         |                                                                                            |
| Teddy                             | Rowland     |                       |                  |             |                                          |                                                         |                                                                                            |
| Juan                              | Ruiz-Unger  |                       |                  |             |                                          |                                                         |                                                                                            |
| Lionel                            | Reyes       |                       |                  |             |                                          |                                                         |                                                                                            |
| Yadira                            | Zamora      |                       |                  |             |                                          |                                                         |                                                                                            |
| Navila                            | Bacallao    |                       |                  |             |                                          |                                                         |                                                                                            |
| John                              | Cienki      |                       |                  |             |                                          |                                                         |                                                                                            |
| Jonathan                          | Cohen       |                       |                  |             |                                          |                                                         |                                                                                            |
| Ying                              | Yuan        |                       |                  |             |                                          |                                                         |                                                                                            |
| Jenny                             | Li          |                       |                  |             |                                          |                                                         |                                                                                            |

Supplemental Online Content: Nonauthor Collaborators

\*First name, last name, and suffix (if applicable) are required and will appear in PubMed.

| *First Name and Middle Initial(s) | *Last Name       | *Suffix (eg, Jr, III) | Academic Degrees | Institution | Location (city, state/province, country) | Role or Contribution, eg, chair, principal investigator | Group (if more than 1 Group listed in the byline) and/or Subgroup (eg, Steering Committee) |
|-----------------------------------|------------------|-----------------------|------------------|-------------|------------------------------------------|---------------------------------------------------------|--------------------------------------------------------------------------------------------|
| Jeremy                            | Szeto            |                       |                  |             |                                          |                                                         |                                                                                            |
| Mark                              | Sulkowski        |                       |                  |             |                                          |                                                         |                                                                                            |
| Lauren                            | Stelmash         |                       |                  |             |                                          |                                                         |                                                                                            |
| Idania                            | Garcia del Sol   |                       |                  |             |                                          |                                                         |                                                                                            |
| Ledular                           | Morales Castillo |                       |                  |             |                                          |                                                         |                                                                                            |
| Anya                              | Gutierrez        |                       |                  |             |                                          |                                                         |                                                                                            |
| Sabrina                           | Prieto           |                       |                  |             |                                          |                                                         |                                                                                            |
| Arch                              | Amon             |                       |                  |             |                                          |                                                         |                                                                                            |
| Andrew                            | Barbera          |                       |                  |             |                                          |                                                         |                                                                                            |
| Andrew                            | Bugajski         |                       |                  |             |                                          |                                                         |                                                                                            |
| Walter                            | Wills            |                       |                  |             |                                          |                                                         |                                                                                            |
| Kellcee                           | Jacklin          |                       |                  |             |                                          |                                                         |                                                                                            |
| Deryl                             | Lamb             |                       |                  |             |                                          |                                                         |                                                                                            |
| Amron                             | Harper           |                       |                  |             |                                          |                                                         |                                                                                            |
| Elmer                             | Stout            |                       |                  |             |                                          |                                                         |                                                                                            |
| Katherine                         | Weeks            |                       |                  |             |                                          |                                                         |                                                                                            |
| Merischia                         | Griffin          |                       |                  |             |                                          |                                                         |                                                                                            |
| Nancy                             | Pyram-Bernard    |                       |                  |             |                                          |                                                         |                                                                                            |
| Arlen                             | Quintero         |                       |                  |             |                                          |                                                         |                                                                                            |
| Eftim                             | Adhami           |                       |                  |             |                                          |                                                         |                                                                                            |
| Giovanni                          | Carrillo         |                       |                  |             |                                          |                                                         |                                                                                            |
| Josette                           | Maria            |                       |                  |             |                                          |                                                         |                                                                                            |
| Diksha                            | Paudel           |                       |                  |             |                                          |                                                         |                                                                                            |
| Oksana                            | Raymond          |                       |                  |             |                                          |                                                         |                                                                                            |
| Jeffrey                           | Summers          |                       |                  |             |                                          |                                                         |                                                                                            |
| Tammy                             | Turner           |                       |                  |             |                                          |                                                         |                                                                                            |
| Ebony                             | Panaccione       |                       |                  |             |                                          |                                                         |                                                                                            |
| Elizabeth                         | Szwast           |                       |                  |             |                                          |                                                         |                                                                                            |
| Ahsan                             | Abdulghani       |                       |                  |             |                                          |                                                         |                                                                                            |
| Pravin                            | Vasoya           |                       |                  |             |                                          |                                                         |                                                                                            |
| Conrad                            | Miller           |                       |                  |             |                                          |                                                         |                                                                                            |
| Hawa                              | Wiley            |                       |                  |             |                                          |                                                         |                                                                                            |
| Austin                            | Chan             |                       |                  |             |                                          |                                                         |                                                                                            |

## Supplemental Online Content: Nonauthor Collaborators

\*First name, last name, and suffix (if applicable) are required and will appear in PubMed.

| *First Name and Middle Initial(s) | *Last Name     | *Suffix (eg, Jr, III) | Academic Degrees | Institution | Location (city, state/province, country) | Role or Contribution, eg, chair, principal investigator | Group (if more than 1 Group listed in the byline) and/or Subgroup (eg, Steering Committee) |
|-----------------------------------|----------------|-----------------------|------------------|-------------|------------------------------------------|---------------------------------------------------------|--------------------------------------------------------------------------------------------|
| Saadia                            | Khizer         |                       |                  |             |                                          |                                                         |                                                                                            |
| Nirav                             | Shah           |                       |                  |             |                                          |                                                         |                                                                                            |
| Oluwadamilola                     | Adeyemi        |                       |                  |             |                                          |                                                         |                                                                                            |
| Wei Ning                          | Chi            |                       |                  |             |                                          |                                                         |                                                                                            |
| July                              | Chen           |                       |                  |             |                                          |                                                         |                                                                                            |
| Melissa                           | Morton-Jost    |                       |                  |             |                                          |                                                         |                                                                                            |
| Julie                             | Castex         |                       |                  |             |                                          |                                                         |                                                                                            |
| Phillip                           | Feliciano      |                       |                  |             |                                          |                                                         |                                                                                            |
| Jacqueline                        | Olivo          |                       |                  |             |                                          |                                                         |                                                                                            |
| Maria                             | Maldonado      |                       |                  |             |                                          |                                                         |                                                                                            |
| Anthony                           | Vecchiarelli   |                       |                  |             |                                          |                                                         |                                                                                            |
| Diana                             | Gaytan-Alvarez |                       |                  |             |                                          |                                                         |                                                                                            |
| Vijaya                            | Cherukuri      |                       |                  |             |                                          |                                                         |                                                                                            |
| Santia                            | Lima           |                       |                  |             |                                          |                                                         |                                                                                            |
| Radica                            | Alicic         |                       |                  |             |                                          |                                                         |                                                                                            |
| Allison A.                        | Lambert        |                       |                  |             |                                          |                                                         |                                                                                            |
| Carissa                           | Urbat          |                       |                  |             |                                          |                                                         |                                                                                            |
| Joni                              | Baxter         |                       |                  |             |                                          |                                                         |                                                                                            |
| Ann                               | Cooper         |                       |                  |             |                                          |                                                         |                                                                                            |
| Dawn                              | Linn           |                       |                  |             |                                          |                                                         |                                                                                            |
| Laura                             | Fisher         |                       |                  |             |                                          |                                                         |                                                                                            |
| Vijay                             | Patel          |                       |                  |             |                                          |                                                         |                                                                                            |
| Yuti                              | Patel          |                       |                  |             |                                          |                                                         |                                                                                            |
| Roshan                            | Talati         |                       |                  |             |                                          |                                                         |                                                                                            |
| Priti                             | Patel          |                       |                  |             |                                          |                                                         |                                                                                            |
| Leonard                           | Ellison        |                       |                  |             |                                          |                                                         |                                                                                            |
| Angee                             | Roman          |                       |                  |             |                                          |                                                         |                                                                                            |
| Jeffrey                           | Harrison       |                       |                  |             |                                          |                                                         |                                                                                            |
| James                             | Moy            |                       |                  |             |                                          |                                                         |                                                                                            |
| Dina                              | Naquiallah     |                       |                  |             |                                          |                                                         |                                                                                            |
| Binod                             | Shah           |                       |                  |             |                                          |                                                         |                                                                                            |
| Santia                            | Lima           |                       |                  |             |                                          |                                                         |                                                                                            |
| Upinder                           | Singh          |                       |                  |             |                                          |                                                         |                                                                                            |

## Supplemental Online Content: Nonauthor Collaborators

\*First name, last name, and suffix (if applicable) are required and will appear in PubMed.

| *First Name and Middle Initial(s) | *Last Name   | *Suffix (eg, Jr, III) | Academic Degrees | Institution | Location (city, state/province, country) | Role or Contribution, eg, chair, principal investigator | Group (if more than 1 Group listed in the byline) and/or Subgroup (eg, Steering Committee) |
|-----------------------------------|--------------|-----------------------|------------------|-------------|------------------------------------------|---------------------------------------------------------|--------------------------------------------------------------------------------------------|
| Yasmin                            | Jazayeri     |                       |                  |             |                                          |                                                         |                                                                                            |
| Andrew                            | O'Donnell    |                       |                  |             |                                          |                                                         |                                                                                            |
| Orlando                           | Quintero     |                       |                  |             |                                          |                                                         |                                                                                            |
| Divya                             | Pathak       |                       |                  |             |                                          |                                                         |                                                                                            |
| Anita                             | Gupta        |                       |                  |             |                                          |                                                         |                                                                                            |
| N                                 | Chandrasekar |                       |                  |             |                                          |                                                         |                                                                                            |
| Clifford                          | Curtis       |                       |                  |             |                                          |                                                         |                                                                                            |
| Briana                            | White        |                       |                  |             |                                          |                                                         |                                                                                            |
| Martha                            | Dockery      |                       |                  |             |                                          |                                                         |                                                                                            |
| Maya                              | Hicks        |                       |                  |             |                                          |                                                         |                                                                                            |
| Tabitha                           | Fortt        |                       |                  |             |                                          |                                                         |                                                                                            |
| Anisa                             | Fortt        |                       |                  |             |                                          |                                                         |                                                                                            |
| Ingrid                            | Jones-Ince   |                       |                  |             |                                          |                                                         |                                                                                            |
| Alix                              | McKee        |                       |                  |             |                                          |                                                         |                                                                                            |
| Jason                             | Wilson       |                       |                  |             |                                          |                                                         |                                                                                            |
| Brenda                            | Farlow       |                       |                  |             |                                          |                                                         |                                                                                            |
| Nina                              | Gentile      |                       |                  |             |                                          |                                                         |                                                                                            |
| Casey                             | Grady        |                       |                  |             |                                          |                                                         |                                                                                            |
| Randall                           | Richwine     |                       |                  |             |                                          |                                                         |                                                                                            |
| Tearani                           | Williams     |                       |                  |             |                                          |                                                         |                                                                                            |
| Penny                             | Pazier       |                       |                  |             |                                          |                                                         |                                                                                            |
| Edward                            | Michelson    |                       |                  |             |                                          |                                                         |                                                                                            |
| Susan                             | Watts        |                       |                  |             |                                          |                                                         |                                                                                            |
| Diluma                            | Kariyawasam  |                       |                  |             |                                          |                                                         |                                                                                            |
| Leann                             | Rodriguez    |                       |                  |             |                                          |                                                         |                                                                                            |
| Jose                              | Luis Garcia  |                       |                  |             |                                          |                                                         |                                                                                            |
| Ismarys                           | Manresa      |                       |                  |             |                                          |                                                         |                                                                                            |
| Angel                             | Achong       |                       |                  |             |                                          |                                                         |                                                                                            |
| Mari                              | Garcia       |                       |                  |             |                                          |                                                         |                                                                                            |
| Sangeeta                          | Khetpal      |                       |                  |             |                                          |                                                         |                                                                                            |
| Faith                             | Posey        |                       |                  |             |                                          |                                                         |                                                                                            |
| Arvind                            | Mahadevan    |                       |                  |             |                                          |                                                         |                                                                                            |
| Santia                            | Lima         |                       |                  |             |                                          |                                                         |                                                                                            |



Supplemental Online Content: Nonauthor Collaborators

\*First name, last name, and suffix (if applicable) are required and will appear in PubMed.

| *First Name and Middle Initial(s) | *Last Name      | *Suffix (eg, Jr, III) | Academic Degrees | Institution | Location (city, state/province, country) | Role or Contribution, eg, chair, principal investigator | Group (if more than 1 Group listed in the byline) and/or Subgroup (eg, Steering Committee) |
|-----------------------------------|-----------------|-----------------------|------------------|-------------|------------------------------------------|---------------------------------------------------------|--------------------------------------------------------------------------------------------|
| Martin                            | Gnoni           |                       |                  |             |                                          |                                                         |                                                                                            |
| Carla                             | VandeWeerd      |                       |                  |             |                                          |                                                         |                                                                                            |
| Erica                             | Sappington      |                       |                  |             |                                          |                                                         |                                                                                            |
| Mitchell                          | Roberts         |                       |                  |             |                                          |                                                         |                                                                                            |
| Jennifer                          | Wang            |                       |                  |             |                                          |                                                         |                                                                                            |
| Melissa                           | Adams           |                       |                  |             |                                          |                                                         |                                                                                            |
| Xinyi                             | Ding            |                       |                  |             |                                          |                                                         |                                                                                            |
| Mark                              | D'Andrea        |                       |                  |             |                                          |                                                         |                                                                                            |
| Mina                              | Aziz            |                       |                  |             |                                          |                                                         |                                                                                            |
| Stephen                           | Lim             |                       |                  |             |                                          |                                                         |                                                                                            |
| Wayne                             | Swink           |                       |                  |             |                                          |                                                         |                                                                                            |
| Emily                             | Bozant          |                       |                  |             |                                          |                                                         |                                                                                            |
| Margaret                          | Powers-Fletcher |                       |                  |             |                                          |                                                         |                                                                                            |
| Delia                             | Miller          |                       |                  |             |                                          |                                                         |                                                                                            |
| Sylvere                           | Mukunzi         |                       |                  |             |                                          |                                                         |                                                                                            |
| Brittney                          | Manning         |                       |                  |             |                                          |                                                         |                                                                                            |
| Carmen                            | Isache          |                       |                  |             |                                          |                                                         |                                                                                            |
| Jennifer                          | Bowman          |                       |                  |             |                                          |                                                         |                                                                                            |
| Angelique                         | Callaghan-Brown |                       |                  |             |                                          |                                                         |                                                                                            |
| Debra                             | Martin          |                       |                  |             |                                          |                                                         |                                                                                            |
| Ashley                            | Ast             |                       |                  |             |                                          |                                                         |                                                                                            |
| Brent                             | Duran           |                       |                  |             |                                          |                                                         |                                                                                            |
| Ashlie                            | Cornejo         |                       |                  |             |                                          |                                                         |                                                                                            |
| Allie                             | Archer          |                       |                  |             |                                          |                                                         |                                                                                            |
| Dushyantha                        | Jayaweera       |                       |                  |             |                                          |                                                         |                                                                                            |
| Maria                             | Almanzar        |                       |                  |             |                                          |                                                         |                                                                                            |
| Vanessa                           | Motel           |                       |                  |             |                                          |                                                         |                                                                                            |
| Neeta                             | Bhat            |                       |                  |             |                                          |                                                         |                                                                                            |
| Daniela                           | Parra           |                       |                  |             |                                          |                                                         |                                                                                            |
| Matthew                           | Pullen          |                       |                  |             |                                          |                                                         |                                                                                            |
| Paula                             | Campora         |                       |                  |             |                                          |                                                         |                                                                                            |
| Matthew                           | Robinson        |                       |                  |             |                                          |                                                         |                                                                                            |
| Michelle                          | Seithel         |                       |                  |             |                                          |                                                         |                                                                                            |

## Supplemental Online Content: Nonauthor Collaborators

\*First name, last name, and suffix (if applicable) are required and will appear in PubMed.

| *First Name and Middle Initial(s) | *Last Name        | *Suffix (eg, Jr, III) | Academic Degrees | Institution | Location (city, state/province, country) | Role or Contribution, eg, chair, principal investigator | Group (if more than 1 Group listed in the byline) and/or Subgroup (eg, Steering Committee) |
|-----------------------------------|-------------------|-----------------------|------------------|-------------|------------------------------------------|---------------------------------------------------------|--------------------------------------------------------------------------------------------|
| Akira                             | Sekikawa          |                       |                  |             |                                          |                                                         |                                                                                            |
| Emily                             | Klawson           |                       |                  |             |                                          |                                                         |                                                                                            |
| Jonathan                          | Arnold            |                       |                  |             |                                          |                                                         |                                                                                            |
| Luis                              | Ostrosky-Zeichner |                       |                  |             |                                          |                                                         |                                                                                            |
| Virginia                          | Umana             |                       |                  |             |                                          |                                                         |                                                                                            |
| Laura                             | Nielsen           |                       |                  |             |                                          |                                                         |                                                                                            |
| Carolyn Z.                        | Grimes            |                       |                  |             |                                          |                                                         |                                                                                            |
| Thomas F.                         | Patterson         |                       |                  |             |                                          |                                                         |                                                                                            |
| Robin                             | Tragus            |                       |                  |             |                                          |                                                         |                                                                                            |
| Bridgette T.                      | Soileau           |                       |                  |             |                                          |                                                         |                                                                                            |
| Patrick E.H.                      | Jackson           |                       |                  |             |                                          |                                                         |                                                                                            |
| Carolina                          | Hallowell         |                       |                  |             |                                          |                                                         |                                                                                            |
| Heather M.                        | Haughey           |                       |                  |             |                                          |                                                         |                                                                                            |
| Bhavna                            | Vaidya-Tank       |                       |                  |             |                                          |                                                         |                                                                                            |
| Cameron                           | Gould             |                       |                  |             |                                          |                                                         |                                                                                            |
| Parul                             | Goyal             |                       |                  |             |                                          |                                                         |                                                                                            |
| Sue                               | Sommers           |                       |                  |             |                                          |                                                         |                                                                                            |
| Haley                             | Pangburn          |                       |                  |             |                                          |                                                         |                                                                                            |
| Carly                             | Jones             |                       |                  |             |                                          |                                                         |                                                                                            |
| John                              | Williamson        |                       |                  |             |                                          |                                                         |                                                                                            |
| Rica                              | Abbott            |                       |                  |             |                                          |                                                         |                                                                                            |
| Hannah                            | Seagle            |                       |                  |             |                                          |                                                         |                                                                                            |
| Mathias                           | DeComarmond       |                       |                  |             |                                          |                                                         |                                                                                            |
| Nicholas                          | Pickell           |                       |                  |             |                                          |                                                         |                                                                                            |
| Unwana                            | Umana             |                       |                  |             |                                          |                                                         |                                                                                            |
| Candace                           | Alleyne           |                       |                  |             |                                          |                                                         |                                                                                            |
| Eddie                             | Armas             |                       |                  |             |                                          |                                                         |                                                                                            |
| Ramon O.                          | Perez Landabur    |                       |                  |             |                                          |                                                         |                                                                                            |
| Michelle                          | De La Cruz        |                       |                  |             |                                          |                                                         |                                                                                            |
| Martha                            | Ballmajo          |                       |                  |             |                                          |                                                         |                                                                                            |
