# Supplementary material
Source: PubMed Central journal article supplement (PMC10656670)
Supplement: jama-e2323363-s005.pdf [file jama-e2323363-s005.pdf]

## Data Sharing Statement

### Data

**Data available:** Yes

**Data types:** Deidentified participant data

**How to access data:** ACTIV-6 is a platform trial using shared placebos. On completion of the platform trial, when there is no risk of unblinding across study arms, the data will be made publicly available by depositing it in an approved data repository such as NHLBI's BioData Catalyst.

**When available:** beginning date: 07-31-2024

### Supporting Documents

**Document types:** None

### Additional Information

**Who can access the data:** ACTIV-6 is a platform trial using shared placebos. On completion of the platform trial, when there is no risk of unblinding across study arms, the data will be made publicly available by depositing it in an approved data repository such as NHLBI's BioData Catalyst.

**Types of analyses:** ACTIV-6 is a platform trial using shared placebos. On completion of the platform trial, when there is no risk of unblinding across study arms, the data will be made publicly available by depositing it in an approved data repository such as NHLBI's BioData Catalyst.

**Mechanisms of data availability:** ACTIV-6 is a platform trial using shared placebos. On completion of the platform trial, when there is no risk of unblinding across study arms, the data will be made publicly available by depositing it in an approved data repository such as NHLBI's BioData Catalyst.
